# Supplementary material for: Methane assisted catalyst synthesis and catalytic conversion of oleic acid
Source: Royal Society of Chemistry journal article supplement (doi:10.1039/d2ta04568k), 2022-01-01
Supplement: d2ta04568k1.pdf [file d2ta04568k1.pdf]

1 **Electronic Supplementary Information: Methane Assisted Catalyst**  
2 **Synthesis and Catalytic Conversion of Oleic Acid**

3

4 Jack S. Jarvis, Zhaofei Li, Shijun Meng, & Hua Song\*

5

6 Department of Chemical and Petroleum Engineering, University of Calgary, 2500 University Dr

7 NW, Calgary, Alberta T2N 1N4, Canada

8

9

10

11

12

13

14

15

16

17

18 \*Corresponding author

19 Fax: +1 (403) 284-4852; Tel: +1 (403) 220-3792;

20 E-mail: [sonh@ucalgary.ca](mailto:sonh@ucalgary.ca)

21

22 *Keywords: Methane Activation, ZSM-5, Oleic Acid, Dry Gel Conversion, imprinting*

23

24

25 **Contents:**

26 Supplementary Figures 1-7

27 Supplementary Tables 1-3

28

29

30

31

32

33

34

35

36

37

38

39

40

41

42

43

44

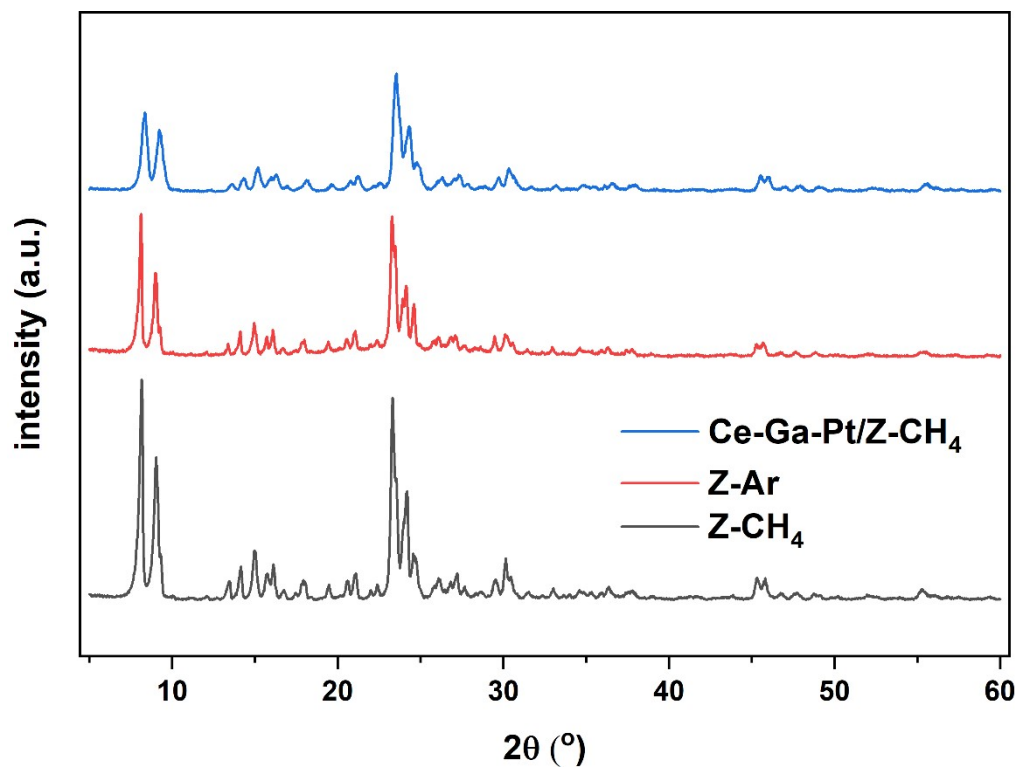

45

46 **Figure S1.** XRD patterns of Z-CH<sub>4</sub> (grey), Z-Ar (red), and Ce-Ga-Pt/Z-CH<sub>4</sub> (blue)

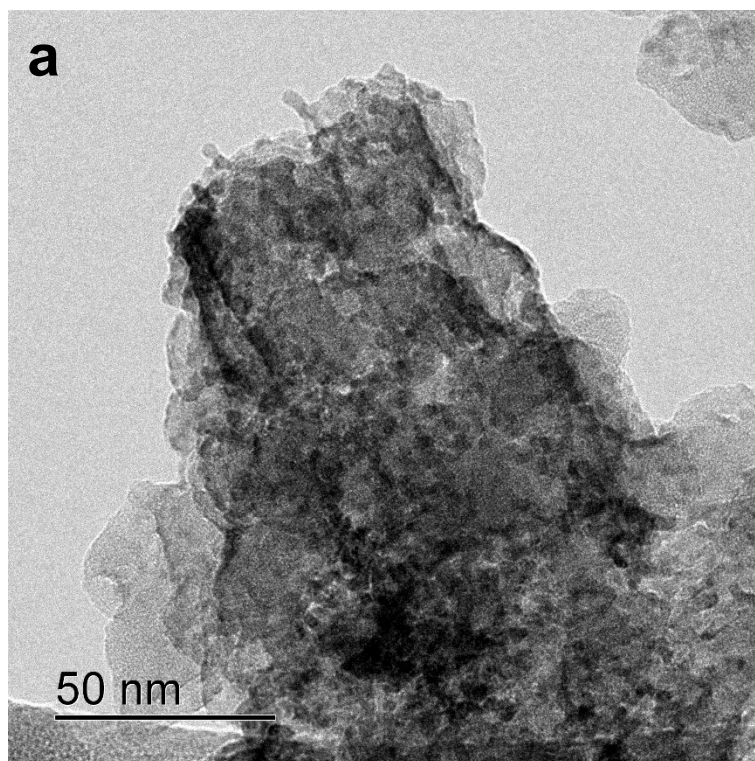

47

48

49

50

51

52

53

54

55

56

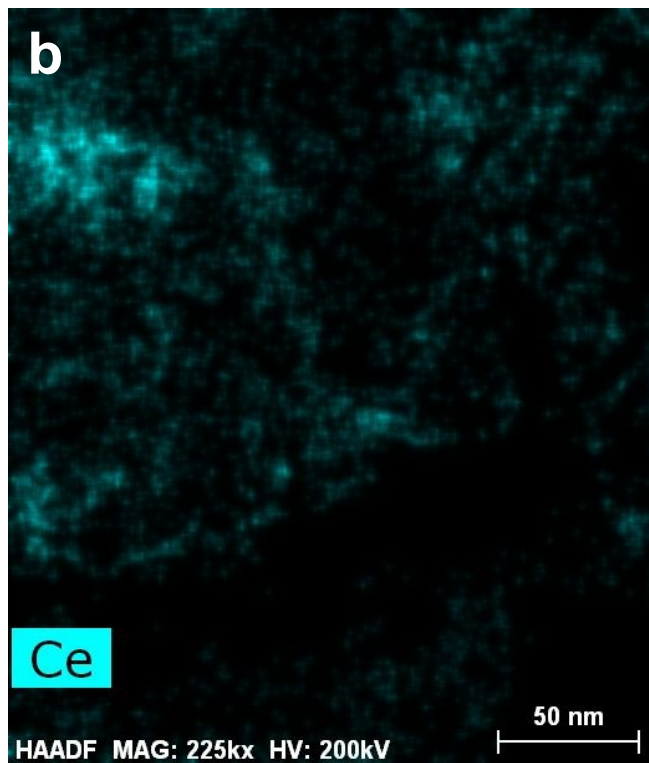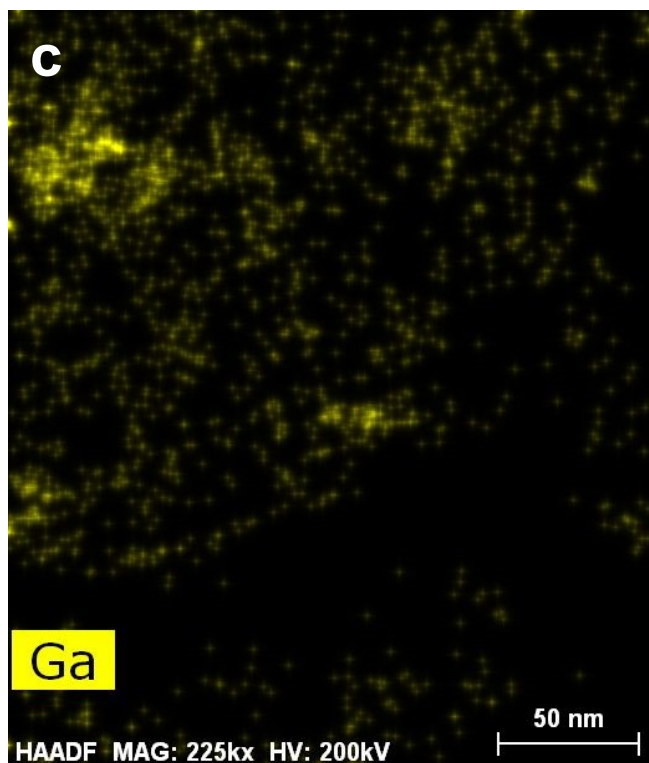

57

58

59  
60  
61  
62  
63  
64  
65  
66  
67

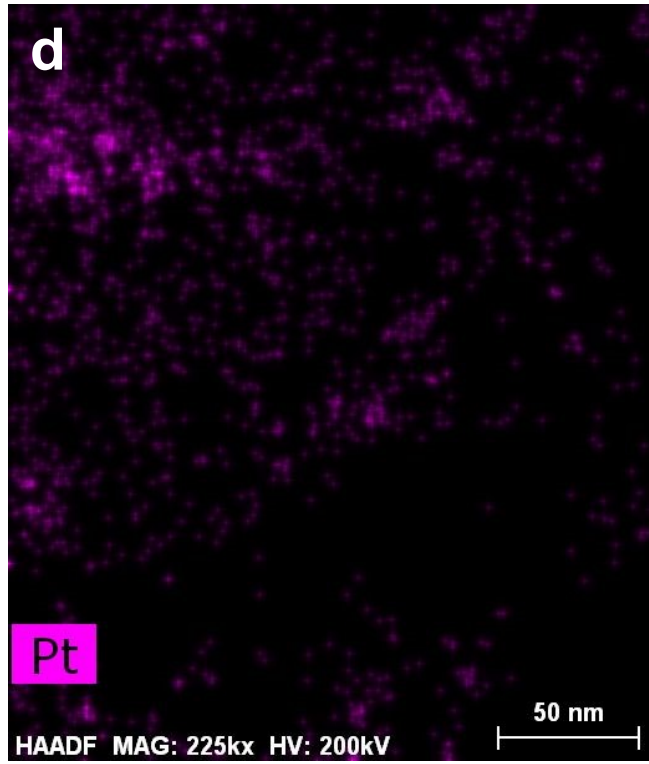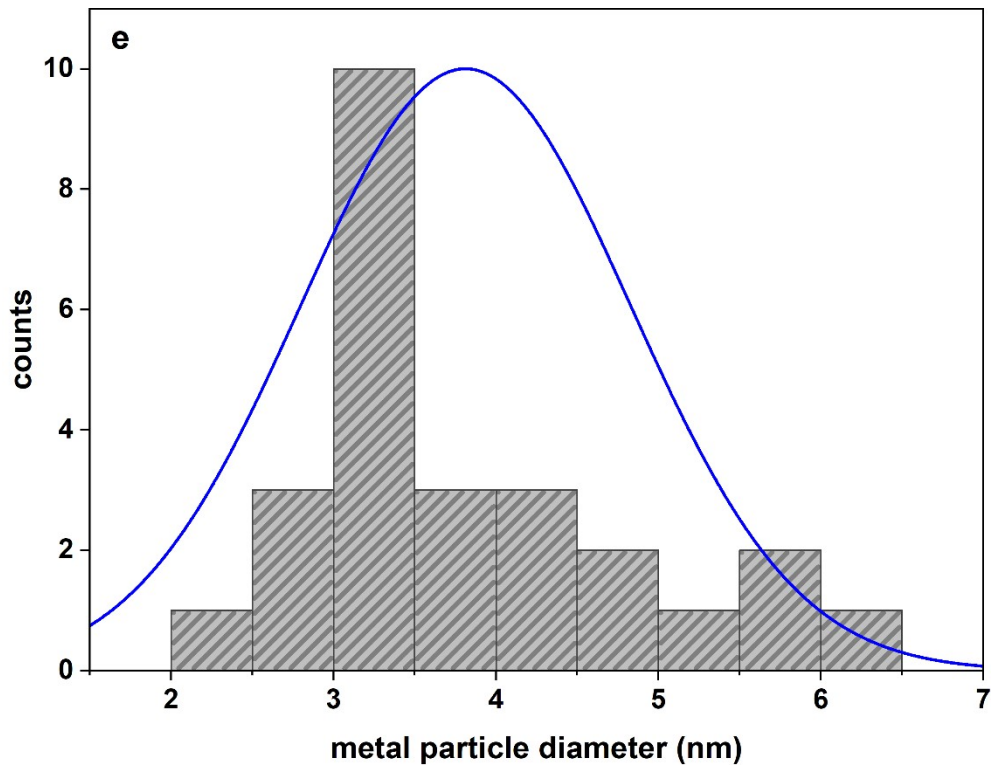

68  
69

70

71

72

73

74

75

76

77

78

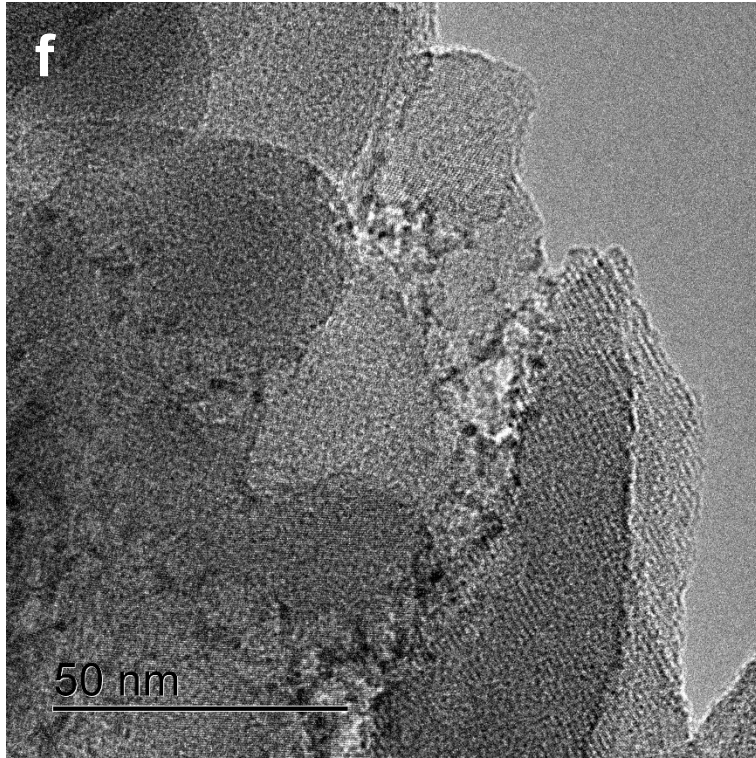

79

80

81

82

83

84

85

86

87

88

89

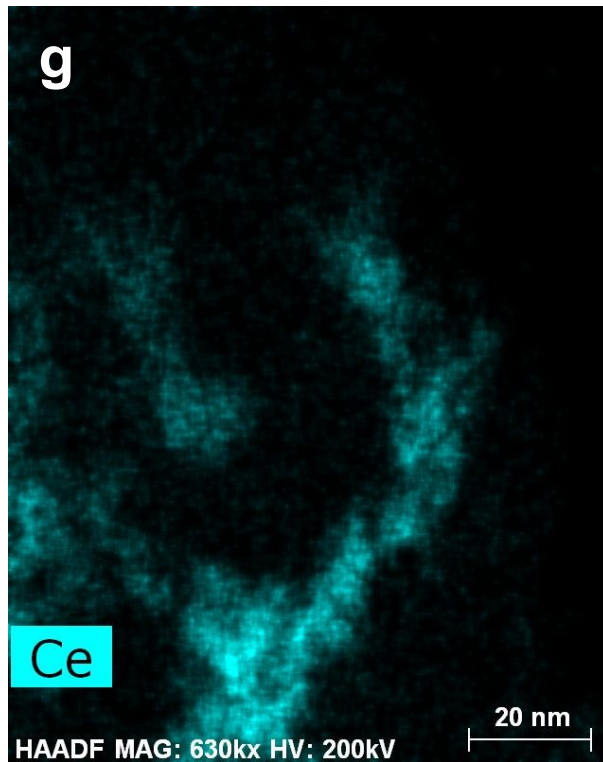

90

91

92

93

94

95

96

97

98

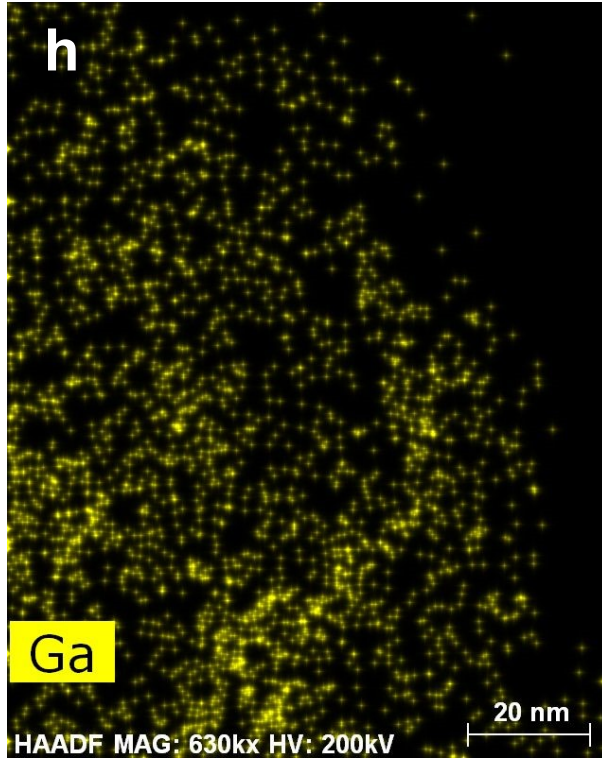

99

100

101

102

103

104

105

106

107

108

109

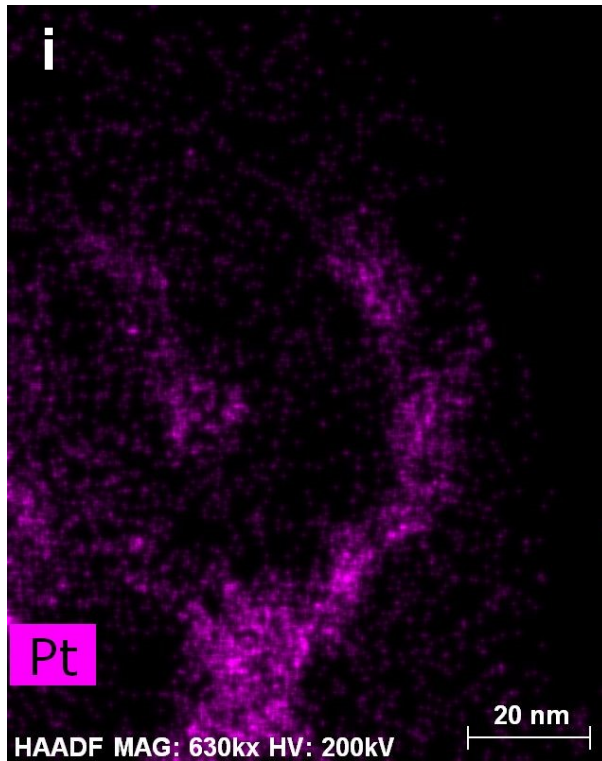

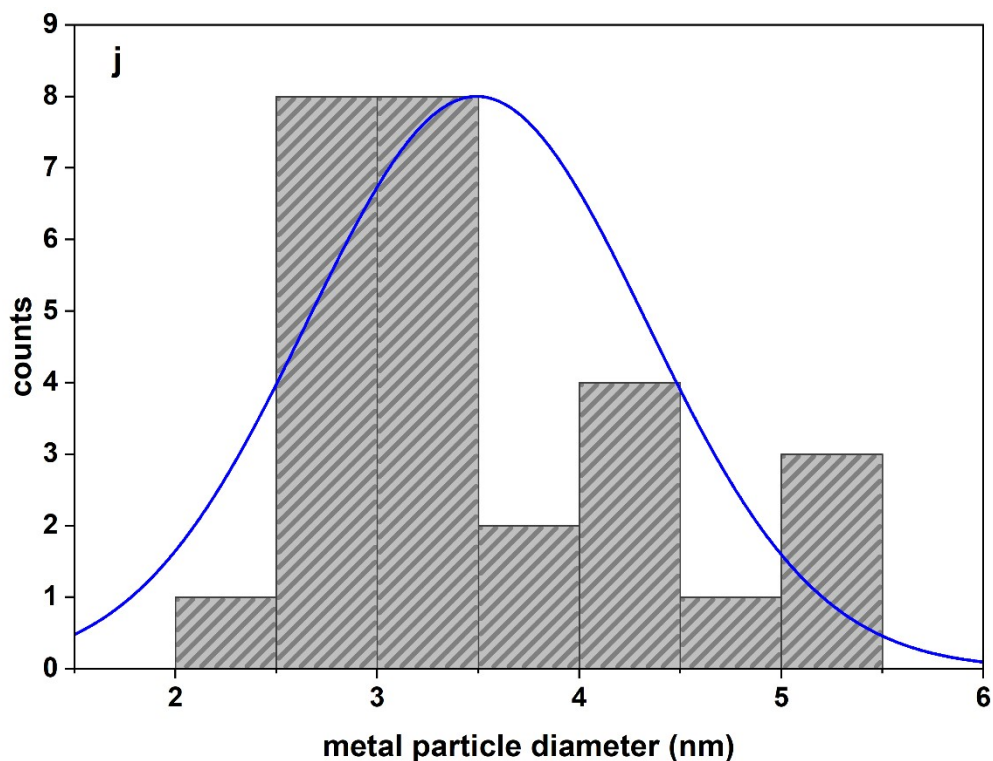

110

111 **Figure S2.** (a) High resolution TEM image of 5%Ce-0.5%Ga-0.5%Pt/Z-CH<sub>4</sub> catalyst, (b)  
 112 TEM/EDX image of Ce species on 5%Ce-0.5%Ga-0.5%Pt/Z-CH<sub>4</sub> catalyst, (c) TEM/EDX image of  
 113 Ga species on 5%Ce-0.5%Ga-0.5%Pt/Z-CH<sub>4</sub> catalyst, (d) TEM/EDX image of Pt species on  
 114 5%Ce-0.5%Ga-0.5%Pt/Z-CH<sub>4</sub> catalyst, (e) distribution of metal particles on 5%Ce-0.5%Ga-  
 115 0.5%Pt/Z-CH<sub>4</sub> catalyst. (f) High resolution TEM image of 5%Ce-0.5%Ga-0.5%Pt/Z-Ar catalyst, (g)  
 116 TEM/EDX image of Ce species on 5%Ce-0.5%Ga-0.5%Pt/Z-Ar catalyst, (h) TEM/EDX image of  
 117 Ga species on 5%Ce-0.5%Ga-0.5%Pt/Z-Ar catalys, (i) TEM/EDX image of Pt species on 5%Ce-  
 118 0.5%Ga-0.5%Pt/Z-Ar catalyst, (j) distribution of metal particles on 5%Ce-0.5%Ga-0.5%Pt/Z-Ar  
 119 catalyst.

120

121

122



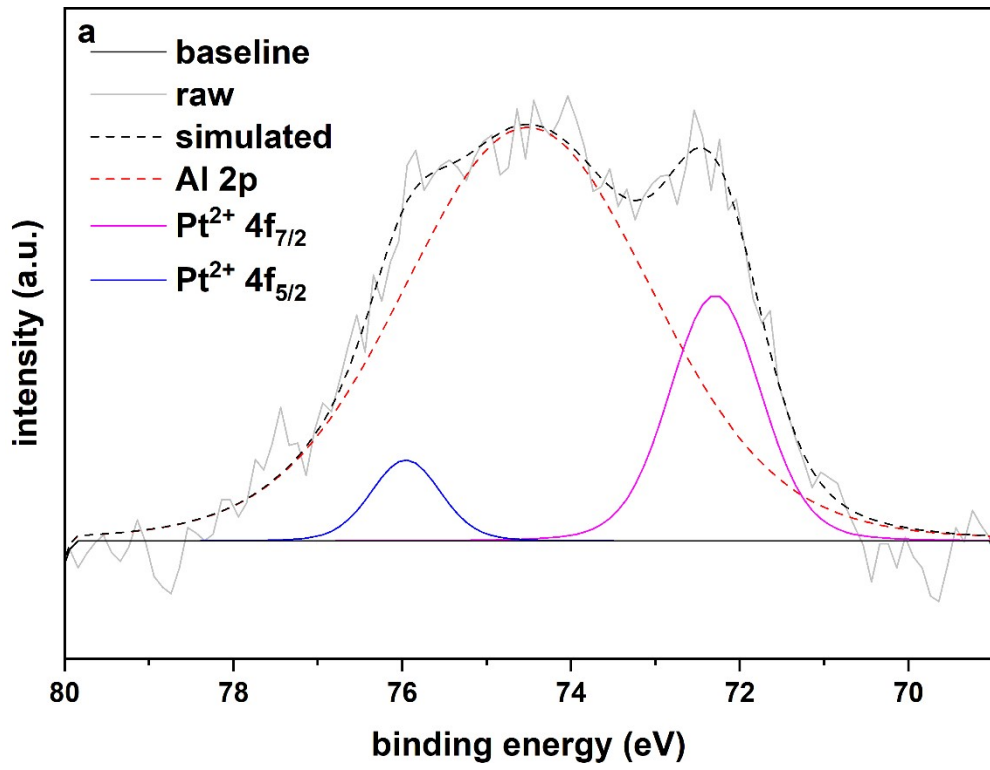

123

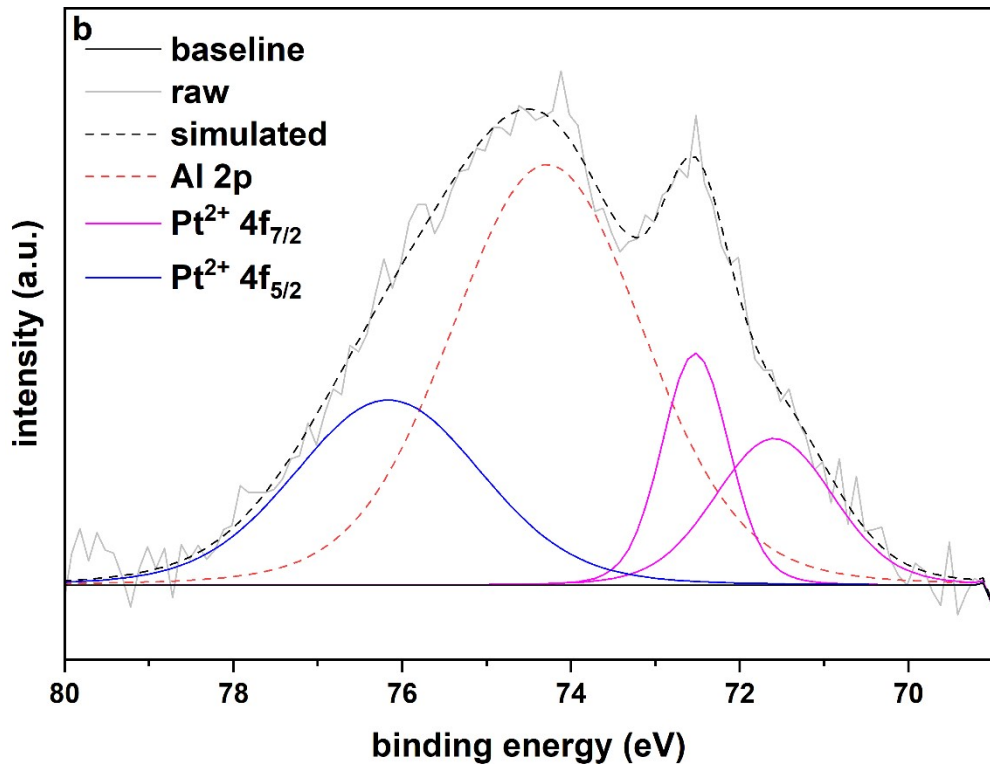

124

125

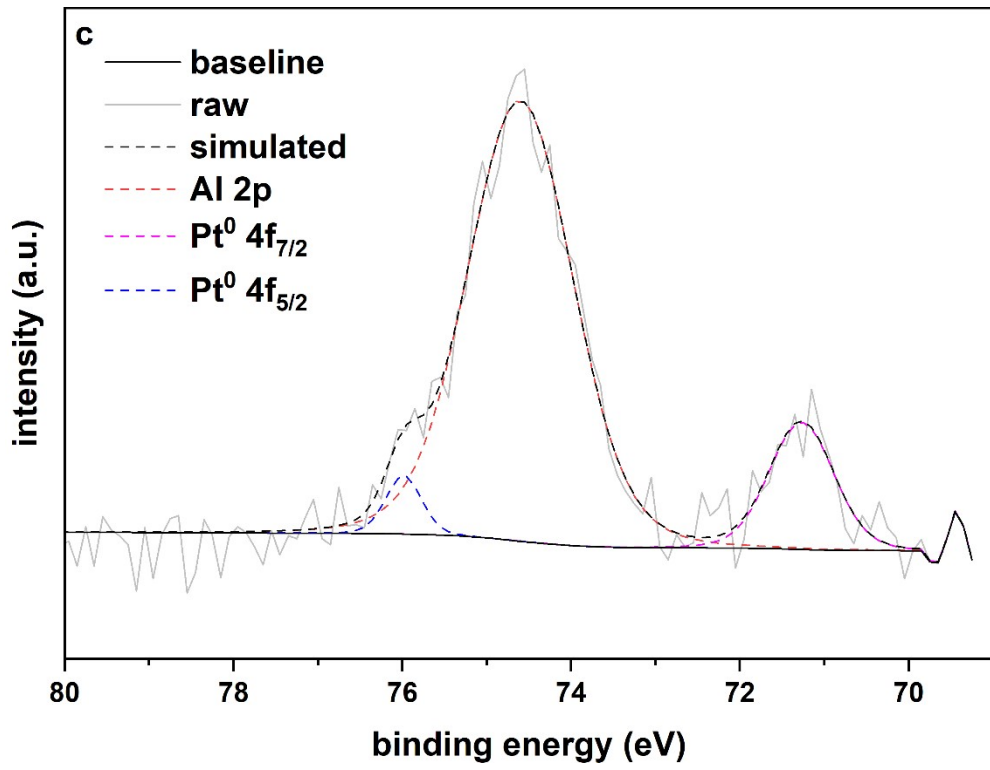

126

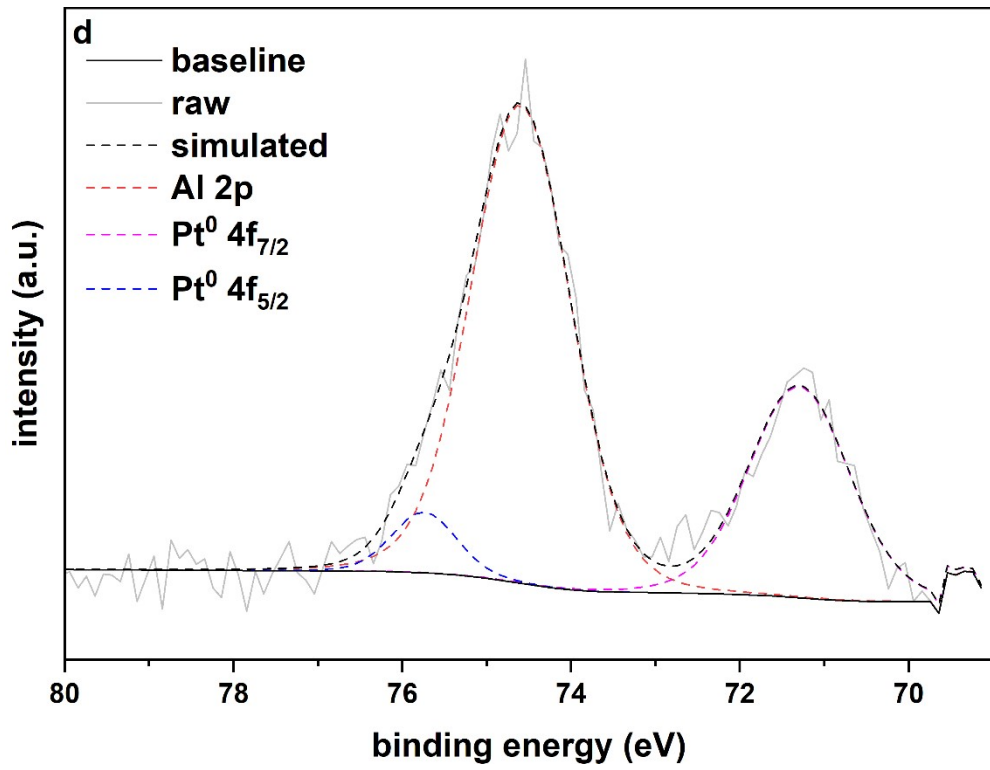

127

128

129 **Figure S3.** (a) XPS spectrum of the Pt4f region of the fresh 5%Ce-0.5%Ga-0.5%Pt/Z-CH<sub>4</sub>  
130 catalyst, (b) the fresh 5%Ce-0.5%Ga-0.5%Pt/Z-Ar catalyst, (c) the spent 5%Ce-0.5%Ga-  
131 0.5%Pt/Z-CH<sub>4</sub> catalyst, (d) the spent5%Ce-0.5%Ga-0.5%Pt/Z-Ar catalyst.

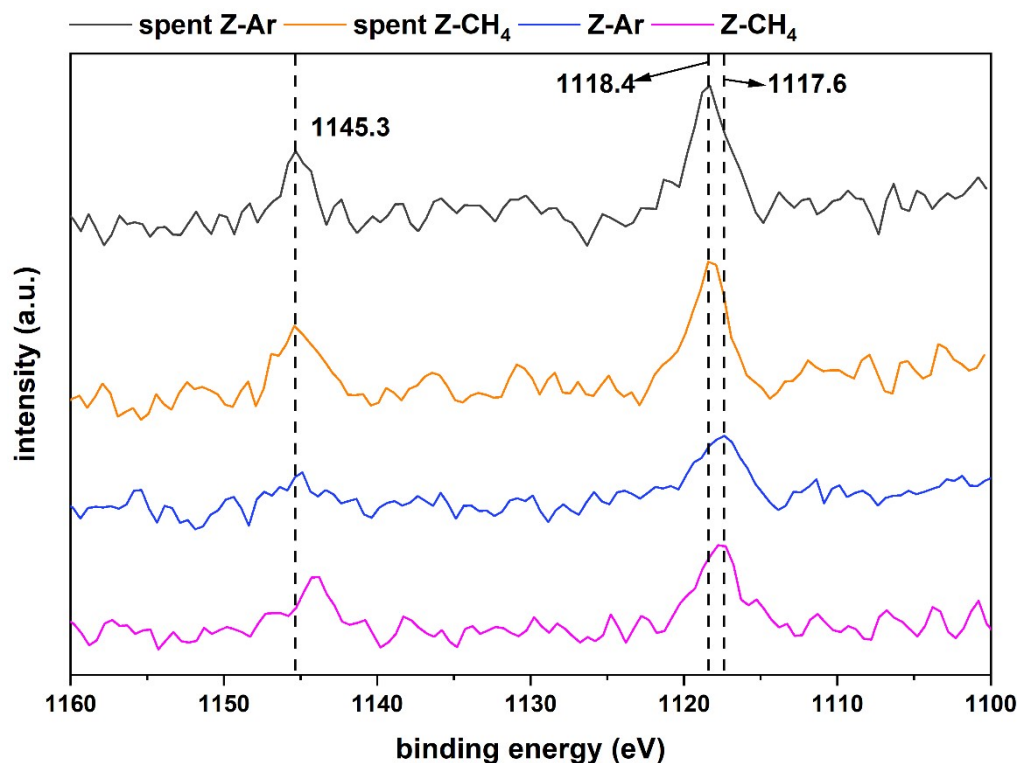

132

133 **Figure S4.** XPS spectrum of the Ga2p region of the fresh 5%Ce-0.5%Ga-0.5%Pt/Z-CH<sub>4</sub> catalyst  
134 (magenta), the fresh 5%Ce-0.5%Ga-0.5%Pt/Z-Ar catalyst (blue), the spent 5%Ce-0.5%Ga-  
135 0.5%Pt/Z-CH<sub>4</sub> catalyst (orange), and the spent 5%Ce-0.5%Ga-0.5%Pt/Z-Ar catalyst (grey).

136

137

138

139

140

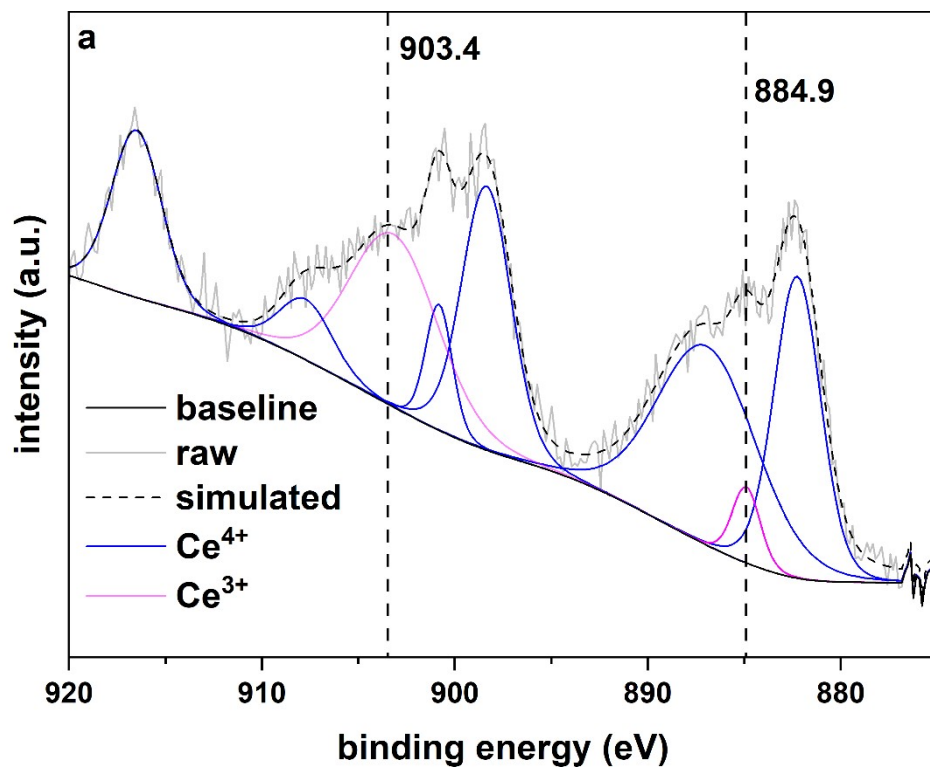

141

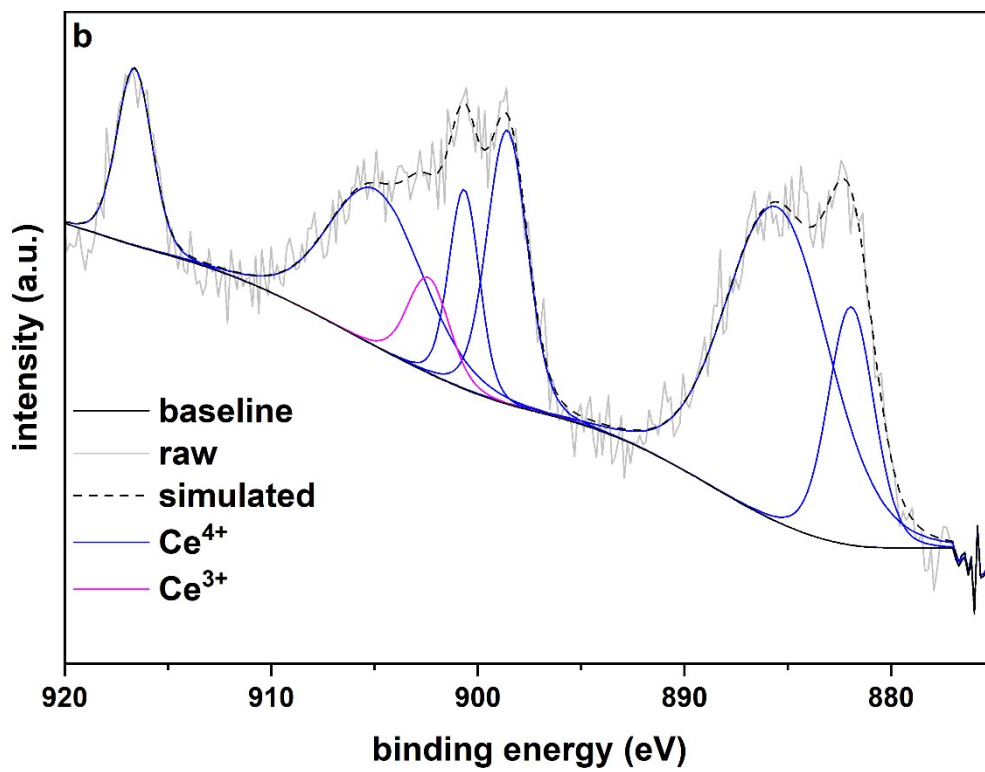

142

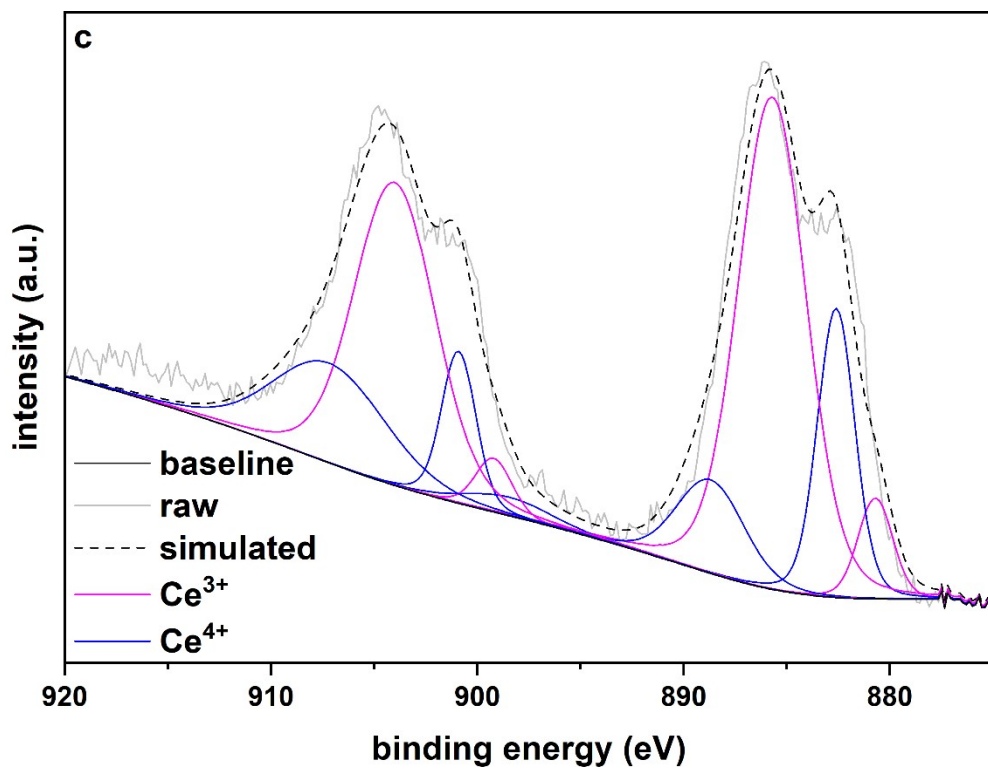

143

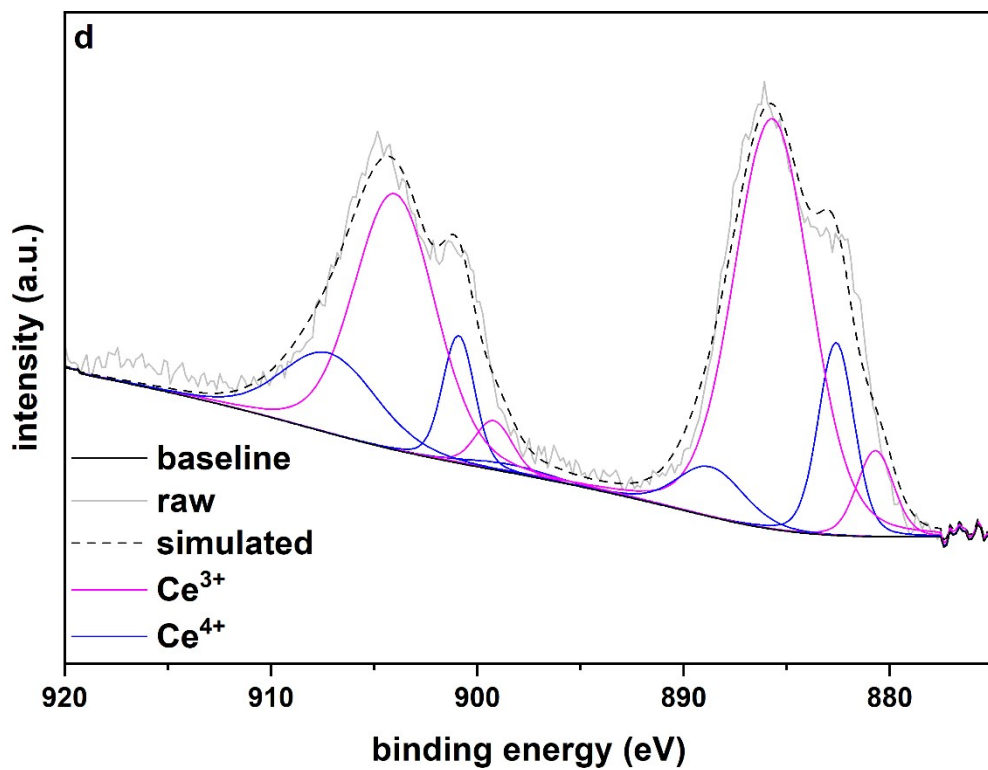

144

145

146 **Figure S5.** (a) XPS spectrum of the Ce3d region of the fresh 5%Ce-0.5%Ga-0.5%Pt/Z-CH<sub>4</sub>  
147 catalyst, (b) the fresh 5%Ce-0.5%Ga-0.5%Pt/Z-Ar catalyst, (c) the spent 5%Ce-0.5%Ga-  
148 0.5%Pt/Z-CH<sub>4</sub> catalyst, (d) the spent5%Ce-0.5%Ga-0.5%Pt/Z-Ar catalyst.

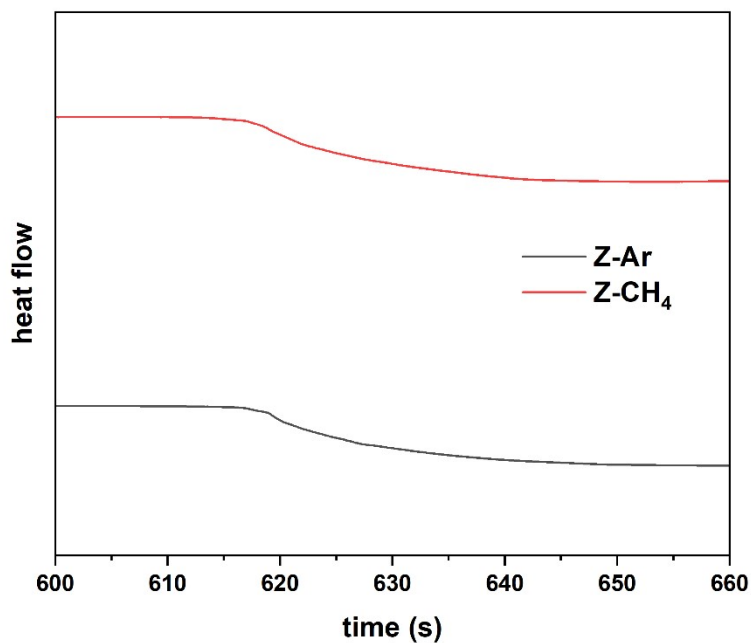

149

150 **Figure S6.** TGA-DSC methane probe of 5%Ce-0.5%Ga-0.5%Pt/Z-Ar and 5%Ce-0.5%Ga-  
151 0.5%Pt/Z-CH<sub>4</sub> catalysts at 25°C.

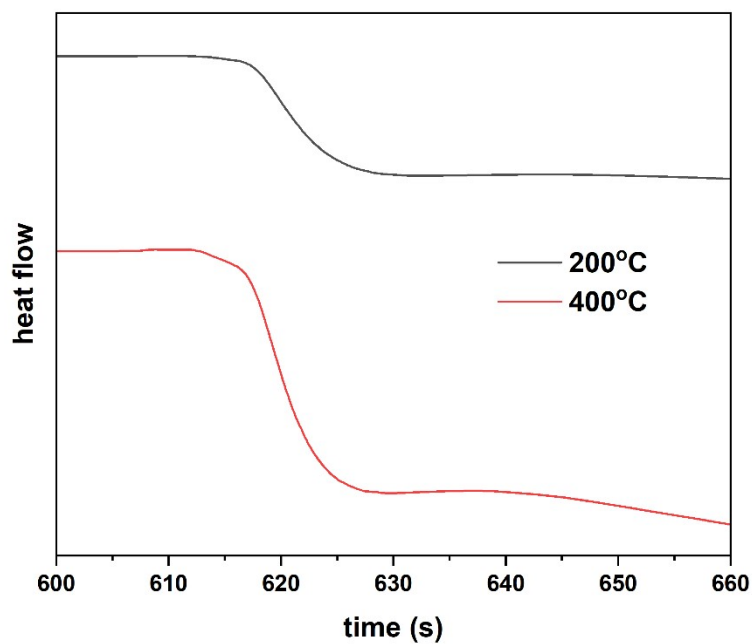

152

153 **Figure S7.** TGA-DSC methane probe of empty (no catalyst) pan at 200°C (black) and 400°C  
 154 (red).

155

156

157

158 **Table S1.** N<sub>2</sub> physisorption data for catalysts.

| <i>Catalyst</i>                  | <i>BET surface area</i><br>(m <sup>2</sup> /g) | <i>External surface</i><br><i>area</i> (m <sup>2</sup> /g) | <i>Micropore area</i><br>(m <sup>2</sup> /g) | <i>Micropore</i><br><i>volume</i> (cm <sup>3</sup> /g) | <i>Total pore</i><br><i>volume</i> (cm <sup>3</sup> /g) | <i>Average pore</i><br><i>diameter</i> (nm) |
|----------------------------------|------------------------------------------------|------------------------------------------------------------|----------------------------------------------|--------------------------------------------------------|---------------------------------------------------------|---------------------------------------------|
| <b>Z-CH<sub>4</sub></b>          | 403.52                                         | 136.94                                                     | 266.58                                       | 0.14                                                   | 0.45                                                    | 4.48                                        |
| <b>Z-Ar</b>                      | 369.55                                         | 115.59                                                     | 253.95                                       | 0.13                                                   | 0.27                                                    | 2.88                                        |
| <b>Ce-Ga-Pt/Z-CH<sub>4</sub></b> | 312.78                                         | 156.80                                                     | 155.98                                       | 0.08                                                   | 0.45                                                    | 5.73                                        |

|                                                        |        |        |        |      |      |      |
|--------------------------------------------------------|--------|--------|--------|------|------|------|
| <b>Ce-Ga-Pt/Z-Ar</b>                                   | 371.15 | 129.09 | 242.06 | 0.13 | 0.31 | 3.35 |
| <b>Ce-Ga-Pt/Z-CH<sub>4</sub></b><br>(CH <sub>4</sub> ) | 204.50 | 107.14 | 97.35  | 0.06 | 0.32 | 6.31 |
| <b>Ce-Ga-Pt/Z-Ar</b><br>(CH <sub>4</sub> )             | 263.26 | 94.60  | 168.66 | 0.10 | 0.24 | 3.58 |

159

160 **Table S2.** ICP-OES data for metal loading of the two supports

| <b>Catalyst</b>                  | <b>Ce loading</b><br>(wt%) | <b>Pt loading</b><br>(wt%) | <b>Ga loading</b><br>(wt%) |
|----------------------------------|----------------------------|----------------------------|----------------------------|
| <b>Ce-Ga-Pt/Z-CH<sub>4</sub></b> | 4.98                       | 0.54                       | 0.56                       |
| <b>Ce-Ga-Pt/Z-Ar</b>             | 4.91                       | 0.53                       | 0.56                       |

161

162

163

164

165

166

167

168 **Table S3.** Product distribution data for all reactions

|                           | <b>Ce-Ga-<br/>Pt/Z-CH<sub>4</sub></b> | <b>Ce-Ga-<br/>Pt/Z-Ar</b> | <b>Ce-Pt/Z-<br/>CH<sub>4</sub></b> | <b>Ce-Ga/Z-<br/>CH<sub>4</sub></b> | <b>Ga-Pt/Z-<br/>CH<sub>4</sub></b> | <b>Ce-Ga-Pt/Z-<br/>CH<sub>4</sub> (N<sub>2</sub>)</b> | <b>Ce-Ga-Pt/Z-<br/>Ar (N<sub>2</sub>)</b> |
|---------------------------|---------------------------------------|---------------------------|------------------------------------|------------------------------------|------------------------------------|-------------------------------------------------------|-------------------------------------------|
| <b>gas yield</b><br>(wt%) | 40.9                                  | 40.5                      | 40                                 | 41.6                               | 39.3                               | 36.5                                                  | 37.1                                      |



|                                           |       |       |       |       |       |      |      |
|-------------------------------------------|-------|-------|-------|-------|-------|------|------|
| <i>liquid yield</i><br>(wt%)              | 57.03 | 57.03 | 57.87 | 57    | 58.73 | 56.6 | 57.5 |
| <i>solid yield</i><br>(wt%)               | 2.8   | 3.2   | 2.6   | 2.3   | 3.2   | 6.1  | 4.7  |
| <i>CH<sub>4</sub> conversion</i><br>(wt%) | 3.2   | 2.1   | 1.6   | 3     | 2.8   |      |      |
| <i>mass balance</i>                       | 100.7 | 100.7 | 100.5 | 100.9 | 101.3 | 99.2 | 99.3 |
| <i>H<sub>2</sub></i>                      | 0.3   | 0.2   | 0.2   | 0.1   | 0.2   | 0.1  | 0.1  |
| <i>=(C<sub>2</sub>-C<sub>5</sub>)=</i>    | 6.6   | 10.9  | 9.1   | 5.4   | 10.5  | 12.6 | 12.5 |
| <i>-(C<sub>2</sub>-C<sub>5</sub>)-</i>    | 19.1  | 17.4  | 16.5  | 20.1  | 16.4  | 8    | 10   |
| <i>CO</i>                                 | 2.2   | 2.9   | 2     | 4.2   | 1.9   | 6.5  | 6    |
| <i>CO<sub>2</sub></i>                     | 12.6  | 9.2   | 12.2  | 11.9  | 10.4  | 8.0  | 7.3  |
| <i>CH<sub>4</sub></i>                     |       |       |       |       |       | 1.2  | 1.2  |
| <i>paraffins</i>                          | 2.4   | 3.6   | 5.1   | 6.1   | 6.4   | 2.9  | 2.1  |
| <i>PAH</i>                                | 1.1   | 2.6   | 1.6   | 1.5   | 2     | 5    | 5.6  |
| <i>aromatics</i>                          | 50.8  | 44.6  | 46.9  | 43.5  | 45.2  | 40   | 39.6 |
| <i>olefins</i>                            | 0.9   | 2.4   | 1.2   | 0.6   | 0.9   | 4.9  | 5    |
| <i>naphthenes</i>                         | 0.9   | 0.6   | 1.8   | 3.7   | 2.9   | 1.7  | 1.9  |
| <i>water</i>                              | 0.7   | 2.7   | 1.2   | 1.2   | 1.1   | 1.5  | 2.3  |
| <i>oxygenates</i>                         | 0.3   | 0.5   | 0.2   | 0.4   | 0.2   | 0.7  | 0.9  |
| <i>benzene</i>                            | 3.4   | 4.4   | 5.5   | 4.1   | 4.6   | 4    | 2.7  |
| <i>toluene</i>                            | 40.1  | 26.8  | 36.8  | 40.7  | 41.2  | 38.9 | 28.7 |
| <i>EB</i>                                 | 7.8   | 5.8   | 5.5   | 5.6   | 7.9   | 6.7  | 9    |

|                                  |      |      |      |      |      |      |     |
|----------------------------------|------|------|------|------|------|------|-----|
| <i>xylene</i> s                  | 16.8 | 22.6 | 18.3 | 17.1 | 20.2 | 19.1 | 24  |
| <i>C</i> <sub>9</sub> aromatics  | 21.2 | 24.8 | 22.4 | 15.9 | 16.9 | 19   | 28  |
| <i>C</i> <sub>10</sub> aromatics | 10.7 | 15.6 | 11.5 | 16.5 | 9.2  | 12.4 | 7.5 |
| <i>CO</i> <sub>2</sub><br>(mmol) | 5.2  | 4.2  | 5.2  | 4.8  | 4.3  | 3.3  | 3   |
| <i>CO</i><br>(mmol)              | 0.7  | 0.9  | 0.5  | 1.3  | 0.6  | 2.1  | 1.9 |
| <i>other</i><br>(mmol)           | 0.5  | 1.3  | 0.7  | 0.2  | 1.5  | 1    | 1.5 |

169

170 \*All values are given as total selectivity in wt% unless mmol, yield, mass balance, and CH<sub>4</sub>

171 conversion are specified.
